# Supplementary material
Source: HighWire-hosted journal article supplement (https://www.rcpjournals.org/highwire/filestream/13713/field_highwire_adjunct_files/1/Van_Den_Tooren_Supplementary_material_S2.pdf)
Supplement: Van_Den_Tooren_Supplementary_material_S2.pdf [file Van_Den_Tooren_Supplementary_material_S2.pdf]

**Supplementary Material S2**

*Table S1. Table to summarise included papers*

| Title                                                                                                                                  | Journal                                                        | First Author          | Year | Minimum follow up time | Follow up                           | Number of patients | Physical Outcome Measure | Cognitive Outcome Measure | Emotional Outcome Measure | Quality of Life Outcome Measure |
|----------------------------------------------------------------------------------------------------------------------------------------|----------------------------------------------------------------|-----------------------|------|------------------------|-------------------------------------|--------------------|--------------------------|---------------------------|---------------------------|---------------------------------|
| Analysis of electroencephalogram characteristics of anti-NMDA receptor encephalitis patients in China                                  | Clinical neurophysiology                                       | Zhang, Y              | 2017 | 6 Months               | Minimum 6 months, range 6-54 months | 62                 | mRS                      |                           |                           |                                 |
| Anti-NMDA receptor encephalitis: Case series and long term outcomes                                                                    | Southeast Asian Journal of Tropical Medicine and Public Health | Chanvanichtra kool, M | 2017 | 2.3 Years              | Range 2.3 - 5.6 years               | 13                 | mRS                      |                           |                           |                                 |
| Association of Progressive Cerebellar Atrophy with Long-term Outcome in Patients With Anti-N-Methyl-d-Aspartate Receptor Encephalitis. | JAMA neurology                                                 | Iizuka, T             | 2016 | 10 Months              | Median 68 months (10-179 months)    | 15                 | mRS                      |                           |                           |                                 |
| Can we differentiate between herpes simplex encephalitis                                                                               | Journal of the Neurological Sciences                           | Kalita, J             | 2016 | 1 Year                 | 1 year                              | 137                | mRS                      | MMSE                      |                           |                                 |

|                                                                                                                                                                  |                               |                   |      |           |                 |      |                       |  |  |            |
|------------------------------------------------------------------------------------------------------------------------------------------------------------------|-------------------------------|-------------------|------|-----------|-----------------|------|-----------------------|--|--|------------|
| and Japanese encephalitis?                                                                                                                                       |                               |                   |      |           |                 |      |                       |  |  |            |
| Cerebrospinal fluid markers of neuronal and glial cell damage to monitor disease activity and predict long-term outcome in patients with autoimmune encephalitis | European Journal of Neurology | Constantinescu, R | 2016 | 9 Months  | 12 +/- 3 months | 25   | mRS                   |  |  |            |
| Characteristics of Seizure and Antiepileptic Drug Utilization in Outpatients with Autoimmune Encephalitis.                                                       | Frontiers in neurology        | Huang, Q          | 2018 | 14 Months | 14-62 months    | 75   | mRS                   |  |  |            |
| Clinical characteristics and outcome of clinically diagnosed viral encephalitis in southwest China                                                               | Neurological Sciences         | Zhao, L           | 2015 | 6 Months  | 6-53 months     | 1107 | Glascow Outcome Score |  |  | EuroQoL-5D |
| Clinical Characteristics and Prognosis of Severe Anti-N-methyl-D-aspartate Receptor Encephalitis Patients.                                                       | Neurocritical Care            | Zhang, Y          | 2018 | 6 Months  | 6-64 months     | 111  | mRS                   |  |  |            |

|                                                                                                             |                                                 |            |      |           |                               |          |               |                                                                                                                                      |                                                  |                        |
|-------------------------------------------------------------------------------------------------------------|-------------------------------------------------|------------|------|-----------|-------------------------------|----------|---------------|--------------------------------------------------------------------------------------------------------------------------------------|--------------------------------------------------|------------------------|
| Clinical outcome and life quality of patients after monophasic encephalitis                                 | Infectious Diseases in Clinical Practice        | Hahn, K    | 2010 | 6 Months  | 6-93 months                   | 72       | Adapted mRS   |                                                                                                                                      | Beck Depression Inventory                        | Lancashire QoL profile |
| Clinical outcome of children presenting with a severe manifestation of acute disseminated encephalomyelitis | Neuropediatrics                                 | Rostasy, K | 2009 | 19 Months | 19 months - 10 years 5 months | 12       | EDSS          | KOPKIJ, HAWIK-III or HAWIVA-III, Visuospatial battery, K-ABC or KiTAP                                                                |                                                  |                        |
| Depressive symptoms following herpes simplex encephalitis - an underestimated phenomenon?                   | General Hospital Psychiatry                     | Fazekas, C | 2006 | 1 Year    | 1-11 years                    | 26       | Rankin scale, |                                                                                                                                      | WHO-5 Wellbeing index                            | SF-12                  |
| Dexamethasone in Herpes Simplex Virus Encephalitis Trial                                                    | International Clinical Trials Registry Platform | Stahl, J   | 2017 | 6 Month   | 6 months and 18 months        | Protocol | mRS, GOS      | Verbal memory score (WMS-IV), WMS-IV, WAIS-IV, trail making tests part A&B, Test of Premorbid Functioning (TOPF), perceived deficits | Beck Depression Index and Beck Anxiety Inventory | Euro-QoL-5D-5L, SF-36  |

|                                                                                                            |                                                 |              |      |          |                 |          |             |                                                                                                                                                                                 |                                                  |                        |
|------------------------------------------------------------------------------------------------------------|-------------------------------------------------|--------------|------|----------|-----------------|----------|-------------|---------------------------------------------------------------------------------------------------------------------------------------------------------------------------------|--------------------------------------------------|------------------------|
|                                                                                                            |                                                 |              |      |          |                 |          |             | questionnaire                                                                                                                                                                   |                                                  |                        |
| Does dexamethasone improve outcomes in adults with HSV encephalitis?                                       | International Clinical Trials Registry Platform | Davies, K    | 2016 | 26 Weeks | 26 and 78 weeks | Protocol | GOS-E, mRS, | WMS-IV auditory memory index, WMS-IV, WAIS-IV, language module in neuropsychological assessment battery, trail making test parts A+B, perceived deficits questionnaire, ACE-III | Beck Depression Index and Beck Anxiety Inventory | Euro-QoL-5D-5L, SF-36, |
| Encephalitis due to Mycobacterium tuberculosis in France.                                                  | Medecine et maladies infectieuses               | Honorat, E   | 2013 | 3 Years  | 3 years         | 20       | GOS         |                                                                                                                                                                                 |                                                  |                        |
| Etiological associations and outcome predictors of acute electroencephalography in childhood encephalitis. | Clinical neurophysiology                        | Mohammad, SS | 2016 | 2 Years  | 2.0–15.8 years  | 119      |             |                                                                                                                                                                                 |                                                  |                        |

|                                                                                                                                                                     |                                                    |             |      |           |                 |          |                                  |                                               |                                  |  |
|---------------------------------------------------------------------------------------------------------------------------------------------------------------------|----------------------------------------------------|-------------|------|-----------|-----------------|----------|----------------------------------|-----------------------------------------------|----------------------------------|--|
| Factors related to long term motor, behavioural and scholastic outcome in children with acute disseminated encephalomyelitis                                        | Neurorehabilitation and Neural Repair              | Iype, M     | 2018 | 1 Year    | 1-10 years      | 102      | mRS, EDSS                        |                                               |                                  |  |
| Factors underlying the development of chronic temporal lobe epilepsy in autoimmune encephalitis                                                                     | Journal of the Neurological Sciences               | Casciato, S | 2019 | 12 Months | 12-60 months    | 33       | mRS                              | MMSE, MOCA, ACE                               | hamilton depression rating scale |  |
| Features and prognostic value of quantitative electroencephalogram changes in critically ill and non-critically ill anti-NMDAR encephalitis patients: A pilot study | Frontiers in Neurology                             | Jiang, N    | 2018 | 12 Months | 12 months       | 26       | mRS                              |                                               |                                  |  |
| Herpes simplex encephalitis treated with acyclovir: diagnosis and long term outcome.                                                                                | Journal of neurology, neurosurgery, and psychiatry | McGrath, N  | 1997 | 6 Months  | 6months-11years | 42       | GOS                              |                                               |                                  |  |
| Immunoglobulin in the treatment of encephalitis (IgNiTE): protocol for a                                                                                            | BMJ open                                           | Iro, MA     | 2016 | 6 Months  | 6 and 12 months | Protocol | GOS-e Peds, Gross motor function | ABAS-II, Bayley Scales for Infant Development | Strength and difficulties        |  |

|                                                                                                   |                                                |              |      |           |                      |     |                        |                                                                                                                                        |                     |  |
|---------------------------------------------------------------------------------------------------|------------------------------------------------|--------------|------|-----------|----------------------|-----|------------------------|----------------------------------------------------------------------------------------------------------------------------------------|---------------------|--|
| multicentre randomised controlled trial                                                           |                                                |              |      |           |                      |     | classification system, | (BSID-III)/Wechsler preschool and Primary Scale of Intelligence III (WPPSI-III)/ Wechsler Intelligence Scale for Children IV (WISC-IV) | questionnaire (SDQ) |  |
| Infectious and Autoantibody-Associated Encephalitis: Clinical Features and Long-term Outcome.     | Pediatrics                                     | Pillai, SC   | 2015 | 1.1 Years | 1.1-14.4 years range | 164 |                        |                                                                                                                                        |                     |  |
| Isolated seizures are a common early feature of paraneoplastic anti-GABA(B) receptor encephalitis | Journal of Neurology                           | Maureille, A | 2019 | 12 Months | 12 and 24 months     | 22  | mRS                    |                                                                                                                                        |                     |  |
| Long-Term Cognitive Outcomes in Patients with Autoimmune Encephalitis.                            | The Canadian journal of neurological sciences. | Hébert, J    | 2018 | 13 Months | 13-182 months        | 21  |                        | MOCA                                                                                                                                   |                     |  |
| Long-term outcome of patients presenting                                                          | Clinical Infectious Diseases                   | Mailles, A   | 2012 | 27 Months | 27-40months          | 253 | GOS                    | Informant questionnaire                                                                                                                |                     |  |

|                                                                                                  |                                                                    |                 |      |           |                                  |    |      |                                       |  |                                              |
|--------------------------------------------------------------------------------------------------|--------------------------------------------------------------------|-----------------|------|-----------|----------------------------------|----|------|---------------------------------------|--|----------------------------------------------|
| with acute infectious encephalitis of various causes in France.                                  |                                                                    |                 |      |           |                                  |    |      | e on cognitive decline in the elderly |  |                                              |
| Long-term outcome of severe herpes simplex encephalitis: a population-based observational study. | Critical Care                                                      | Jouan, Y        | 2015 | 1 Year    | 1 year                           | 14 | GOS  |                                       |  |                                              |
| Long-term outcomes and risk factors associated with acute encephalitis in children               | Journal of the Pediatric Infectious Diseases Society               | Rao, S          | 2017 | 1 Year    | Minimum 1 year, Median 1.3 years | 49 |      |                                       |  | Pediatric Quality of Life Inventory (PedsQL) |
| Long-term prognosis of pediatric patients with relapsing acute disseminated encephalomyelitis    | Journal of Child Neurology                                         | Mar, S          | 2010 | 2 Years   | 2-23.1 years                     | 33 | EDSS |                                       |  |                                              |
| Outcome of children with japanese encephalitis and predictors of outcome in southwestern China   | Transactions of the Royal Society of Tropical Medicine and Hygiene | Ma, J           | 2013 | 6 Months  | Minimum 6 months                 | 87 |      |                                       |  |                                              |
| Outcomes of West Nile encephalitis patients after 1 year of West Nile encephalitis               | Journal of Medical Virology                                        | Balakrishnan, A | 2016 | 12 Months | 12 months                        | 40 |      | MMSE                                  |  |                                              |

|                                                                                                                                       |                                    |              |      |             |                                                                                 |     |                                               |  |                                                           |  |
|---------------------------------------------------------------------------------------------------------------------------------------|------------------------------------|--------------|------|-------------|---------------------------------------------------------------------------------|-----|-----------------------------------------------|--|-----------------------------------------------------------|--|
| outbreak in Kerala, India: A follow-up study                                                                                          |                                    |              |      |             |                                                                                 |     |                                               |  |                                                           |  |
| Predictors of outcome in HSV encephalitis                                                                                             | Neurology                          | Singh, TD    | 2016 | 41.4 Months | 41.4-116.3 months                                                               | 45  | mRS                                           |  |                                                           |  |
| Risk factors for mortality in patients with anti-NMDA receptor encephalitis.                                                          | Acta neurologica Scandinavica      | Chi, X       | 2017 | 7 Months    | 7-57 months                                                                     | 96  | mRS                                           |  | Zung depression scale, (ZDS) and Zung anxiety scale (ZAS) |  |
| Seizure outcomes in patients with anti-NMDAR encephalitis: A follow-up study                                                          | Epilepsia                          | Liu, X       | 2017 | 6 Months    | 6-60 months                                                                     | 109 | National Hospital Seizure Severity Scale, mRS |  |                                                           |  |
| Status epilepticus as a risk factor for postencephalitic parenchyma loss evaluated by ventricle brain ratio measurement on MR imaging | American Journal of Neuroradiology | Herrmann, EK | 2006 | 6 Months    | 6–84 months (median, 35 months; lower quartile, 12.3; upper quartile, 57; mean, | 40  | mRS adapted for encephalitis                  |  |                                                           |  |



|                                                                                                                                |                               |         |      |           |                                        |    |          |                                                   |  |  |
|--------------------------------------------------------------------------------------------------------------------------------|-------------------------------|---------|------|-----------|----------------------------------------|----|----------|---------------------------------------------------|--|--|
|                                                                                                                                |                               |         |      |           | 36.9; SD, 23.9).                       |    |          |                                                   |  |  |
| Status epilepticus associated with acute encephalitis: long-term follow-up of functional and cognitive outcomes in 72 patients | European Journal of Neurology | Chen, W | 2018 | 12 Months | 12 months                              | 72 | mRS, ADL | Telephone Interview for Cognitive Status (TICS-M) |  |  |
| Tocilizumab in Autoimmune Encephalitis Refractory to Rituximab: An Institutional Cohort Study.                                 | Neurotherapeutics             | Lee, WJ | 2016 | 9 Months  | 21.1 +/- 9.2 months (minimum 9 months) | 91 | mRS      |                                                   |  |  |

**ABAS** – Adaptive Behaviour Assessment System, **ACE-III** - addenbrookes cognitive assessment, **ADL** – Activities of Daily Living, **BAI** – Beck Anxiety Inventory, **BDI** – Beck Depression Inventory, **BSID** - Bayley Scales for Infant Development, **EQ-5D** - European 5-dimensional health scale, **EDSS** - Expanded Disability Status Scale, **GMFCS** - Gross motor function classification system, **GOS** – Glasgow Outcome Scale, **GOS-E** - Glasgow Outcome Scale Extended, **HAWIK** - Hamburg Wechsler Intelligence Tests for Children, **HDRS** - Hamilton Depression Rating Scale, **HOWIVA** - Hannover–Wechsler Intelligence Scale for Preschool Children, **IQCODE** - Informant questionnaire on cognitive decline in the elderly, , **K-ABC** - Kaufman Assessment Battery for Children, **KiTAP** - Test of Attentional Performance for Children, **KOPKIJ** - kognitive probleme bei Kindern und Jugendlichen, **LOS** - Liverpool outcome score, **MMSE** – Mini Mental State Examination, **MOCA** – Montreal Cognitive Assessment, **mRS** – Modified Ranking Scale, **NAB** – Neuropsychological Assessment Battery **NHS3** - National Hospital Seizure Severity Scale, **PedsQL** - Pediatric Quality of Life Inventory, **SDQ** - strength and difficulties questionnaire, **SF-12/36** – Short Form 12/36, **TICS-M** - Telephone Interview for Cognitive Status, **TOPF** – Test of Premorbid functioning, **WAIS** - Wechsler Adult Intelligence Scale, **WISC-IV** - Wechsler Intelligence Scale for Children, **WMS** - Wechsler Memory Scale, **WPPSI-III** - Wechsler preschool and Primary Scale of Intelligence III, **ZAS** – Zung Anxiety Scale, **ZDS** – Zung Depression Scale.
